# Supplementary material
Source: MDPI journal article supplement (https://www.mdpi.com/2311-7524/10/1/26)
Supplement: s1 [file s1]

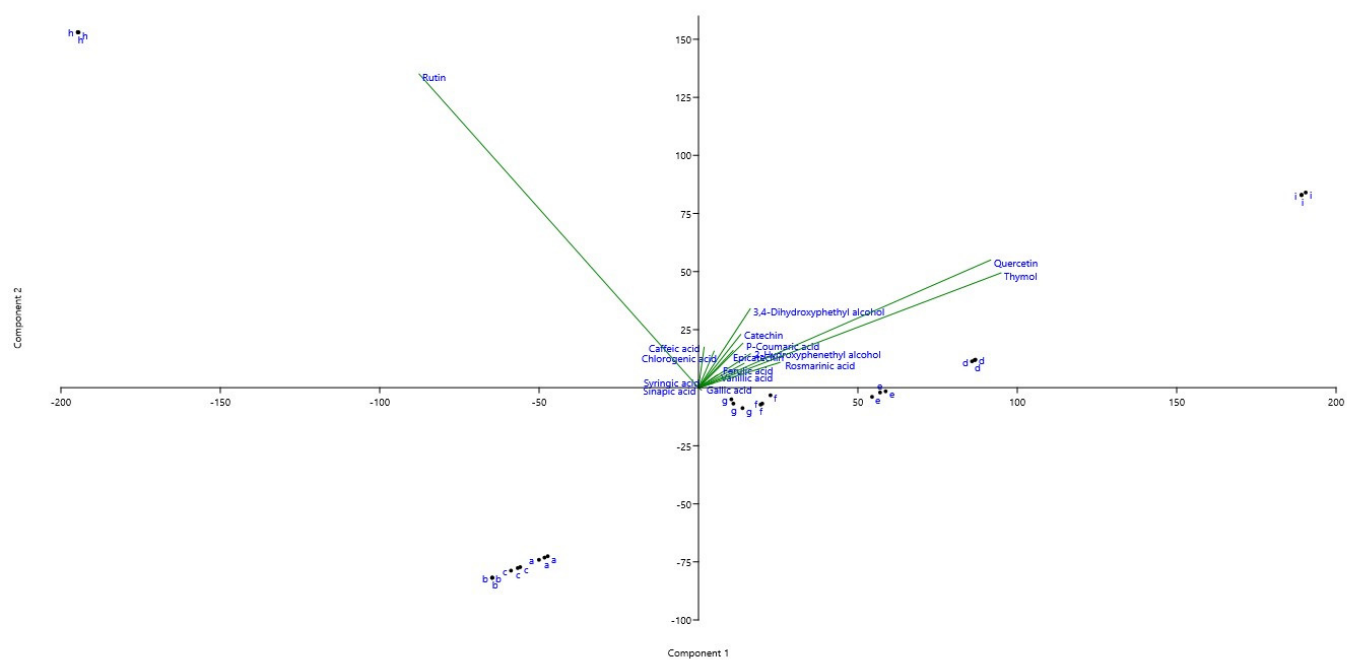

**Figure S1.** Principal Component Analysis (PCA) and its associated biplot showing the distribution of 314 phenolic compounds using different biostimulants.
